# Supplementary material for: Shape-dependent magnetic properties of low-dimensional nanoscale Prussian blue (PB) analogue SmFe(CN)6·4H2O
Source: Royal Society of Chemistry journal article supplement (doi:10.1039/b507240a), 2005-01-01
Supplement: b507240a.pdf [file b507240a.pdf]

## Shape-Dependent Magnetic Properties of Low-Dimensional Nanoscale Prussian Blue (PB) Analogue $\text{SmFe}(\text{CN})_6 \cdot 4\text{H}_2\text{O}$

Hao-Ling Sun,<sup>a</sup> Hongtao Shi,<sup>b</sup> Fei Zhao,<sup>a</sup> Limin Qi<sup>\*b</sup> and Song Gao<sup>\*a</sup>

### Supporting Information:

#### Experimental Section

**Synthesis of low-dimensional nanoscale  $\text{SmFe}(\text{CN})_6 \cdot 4\text{H}_2\text{O}$ .** The synthesis of  $\text{SmFe}(\text{CN})_6 \cdot 4\text{H}_2\text{O}$  nanostructures was simply achieved by the reaction of  $\text{Fe}(\text{CN})_6^{3-}$  and  $\text{Sm}^{3+}$  ions solubilized in the reverse micelles.

$\text{SmFe}(\text{CN})_6 \cdot 4\text{H}_2\text{O}$  nanorods were prepared in the polyoxyethylene (5) nonylphenyl ether (NP-5) reverse micelle system. Typically, 0.24 g of NP-5 was first dissolved in 10 mL of cyclohexane. Then, 100  $\mu\text{L}$  of 0.3  $\text{mol L}^{-1}$   $\text{K}_3\text{Fe}(\text{CN})_6$  solution was added with shaking, which was followed by the addition of 100  $\mu\text{L}$  of 0.5  $\text{mol L}^{-1}$   $\text{SmCl}_3$  and vigorous shaking, giving reactant concentrations of  $[\text{Fe}(\text{CN})_6^{3-}] = 0.15 \text{ mol L}^{-1}$  and  $[\text{Sm}^{3+}] = 0.25 \text{ mol L}^{-1}$  with respect to the aqueous phase of the reverse micelles. Finally, the resultant mixture was incubated for 24 hours at 50 °C, resulting in the formation of red precipitate.

$\text{SmFe}(\text{CN})_6 \cdot 4\text{H}_2\text{O}$  nanobelts were prepared in the cetyltrimethylammonium bromide (CTAB) reverse micelle system. Typically, 0.24 g of CTAB and 160  $\mu\text{L}$  n-hexanol was first dissolved in 4 mL of cyclohexane under heating. Then, 120  $\mu\text{L}$  of 0.3  $\text{mol L}^{-1}$   $\text{K}_3\text{Fe}(\text{CN})_6$  solution was added with shaking followed by the addition of 120  $\mu\text{L}$  of 0.5  $\text{mol L}^{-1}$   $\text{SmCl}_3$  and incubation for 24 hours at 50 °C.

For comparison purpose, the synthesis was also carried out in aqueous solution. The  $\text{SmFe}(\text{CN})_6 \cdot 4\text{H}_2\text{O}$  microrods were prepared by mixing aqueous solutions of 0.3  $\text{mol L}^{-1}$   $\text{K}_3\text{Fe}(\text{CN})_6$  and 0.5  $\text{mol L}^{-1}$   $\text{SmCl}_3$  with a volume ratio of 1:1, which was followed by incubation for 6 hours at 50 °C.

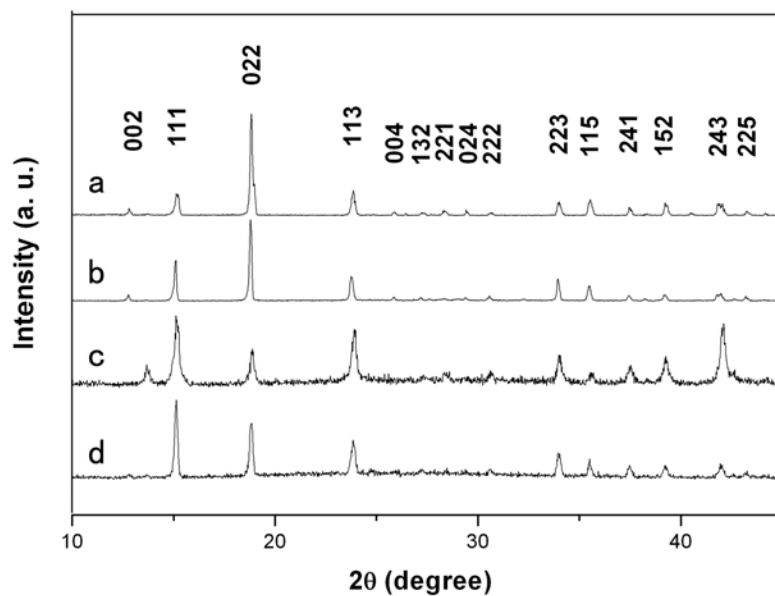

Fig. S1. XRD patterns of different SmFe(CN)<sub>6</sub>·4H<sub>2</sub>O crystals: (a) microrods obtained in aqueous solution; (b) nanorods obtained in NP-5 reverse micelles; (c) nanobelts obtained in CTAB/*n*-hexanol reverse micelles; (d) narrow nanobelts obtained in CTAB/*n*-decanol reverse micelles.

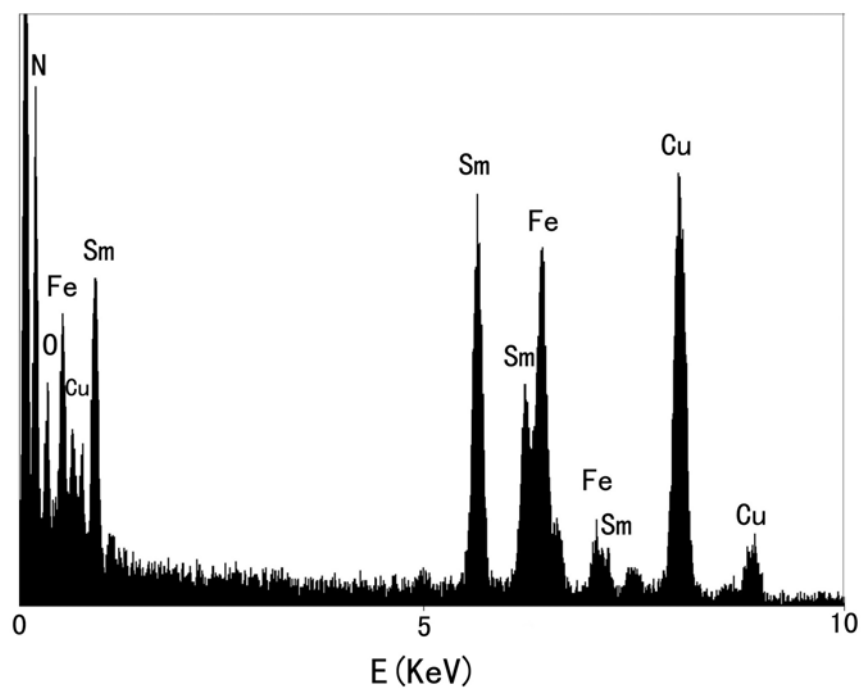

Fig. S2. EDS spectrums of  $\text{SmFe}(\text{CN})_6 \cdot 4\text{H}_2\text{O}$  nanobelts obtained in CTAB/*n*-hexanol reverse micelles.

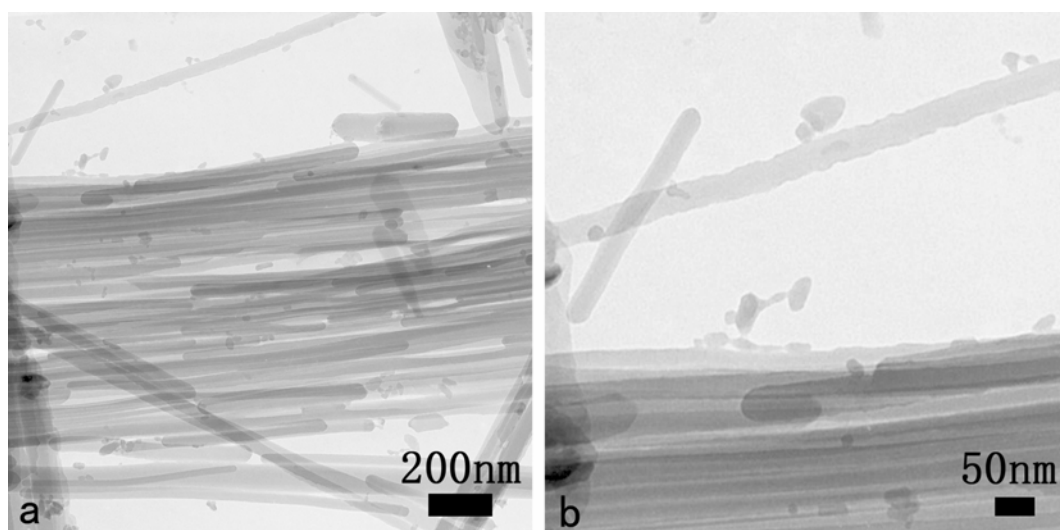

Fig. S3. TEM images of  $\text{SmFe}(\text{CN})_6 \cdot 4\text{H}_2\text{O}$  narrow nanobelts obtained in CTAB/*n*-decanol reverse micelles.

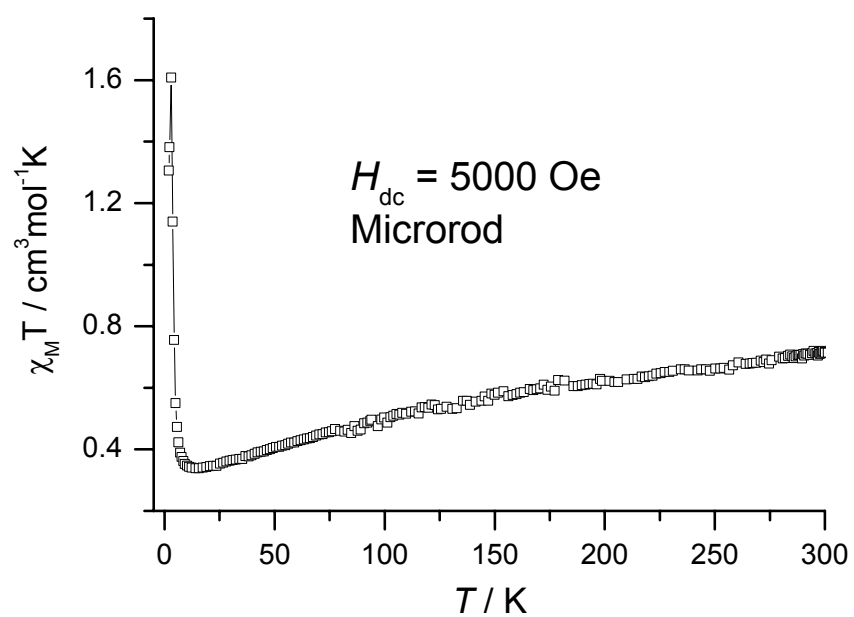

Fig. S4. Temperature dependence of  $\chi_M T$  for  $\text{SmFe}(\text{CN})_6 \cdot 4\text{H}_2\text{O}$  microrods.
